1 **Title: Anterior corpus callosum modulates symmetric forelimb movements during**  
2 **spontaneous food handling behavior of rats.**

3

4 **Author**

5 Masakazu Igarashi<sup>1</sup>, Yumiko Akamine<sup>1</sup>, and Jeffery R Wickens<sup>1</sup>

6 1. Neurobiology Research Unit, Okinawa Institute of Science and Technology Graduate  
7 University, Okinawa, Japan

8

9

10 **Corresponding author**

11 Jeffery R Wickens

12 Neurobiology Research Unit, Okinawa Institute of Science & Technology Graduate University  
13 1919-1 Tancha, Onna, Okinawa, 904-0495, Japan

14

15

16 **Keywords**

17 Corpus callosum; bimanual coordination; head-fixation; motion capture technology;  
18 classification of behavior; kinematic analysis

19

20

21 **Author contributions**

22 M.I. and J.W. designed experiments. M.I. conducted experiments and drafted manuscript and  
23 figures. Y.A. conducted histology. J.W. revised manuscript.

1 **Abstract**

2 Bimanual motor actions, such as threading a needle, require coordination of the  
3 movements of each hand according to the state of the other hand. By connecting  
4 homologous cortical regions between the two cerebral hemispheres, the corpus callosum  
5 is thought to play a key role in such bimanual coordination. However, direct experimental  
6 evidence of the contribution of the corpus callosum to natural behaviors requiring  
7 bimanual coordination, such as feeding, is lacking. We investigated the hypothesis that  
8 the corpus callosum mediates bimanual movements during food-handling behavior. We  
9 first traced the forelimb-related components of the motor corpus callosum in Long-Evans  
10 rats, and found that the callosal fiber bundle from the forelimb motor areas passes through  
11 the anterior part of the corpus callosum. We then confirmed by electrophysiological  
12 recordings that blocking the axonal conduction of fibers in the anterior corpus callosum  
13 reduced neural transmission between cortical forelimb areas. The causal role of corpus  
14 callosum in bimanual coordination was then tested by analyzing forelimb kinematics  
15 during object manipulation, before and after blocking axonal conduction in the anterior  
16 corpus callosum. We found the frequency of occurrence of symmetric bimanual  
17 movements was reduced by inhibition of anterior corpus callosum. In contrast,  
18 asymmetric bimanual movement was increased. Our findings suggest that the anterior  
19 corpus callosum coordinates the direction of bimanual movement.

## 1 **Introduction**

2 Bimanual coordination is one of the most frequently observed motor behavior in our daily life  
3 (Vega-González and Granat 2005). Human exhibit advanced capabilities for bimanual  
4 coordination. For example, controlling a steering wheel while turning a corner requires both  
5 hands. Similarly, bimanual coordination is necessary for the most basic needs of living, such as  
6 feeding, which are also important for non-human primates and rodents (Brinkman 1981;  
7 Whishaw and Coles 1996). To use both hands in a coordinated manner, motor commands  
8 between the two sides of the body must be integrated. Given that the motor representations are  
9 lateralized in primary motor cortex (Boldrey and Penfield 1937), i.e., the sides of the body are  
10 represented in separate hemispheres, a bilaterally interconnecting neural structure may be  
11 crucial for coordinating the right and the left side. The corpus callosum is a direct commissure  
12 between cerebral hemispheres, which may provide integration of motor command between  
13 contralateral cortices.

14         The corpus callosum is thought to be important for bimanual coordination because it  
15 provides neural connections between homologous cortical regions in the two hemispheres  
16 cortices (Hofer and Frahm 2006; Gooijers and Swinnen 2014). Such connectivity favors  
17 concurrent activation of homologous motor representations bilaterally. In support of this idea,  
18 a spontaneous transition from asymmetric motor pattern (activation of muscle groups in  
19 different timing) to symmetric motor pattern (activation of different muscle groups in  
20 same/different timing) has been reported in many experimental conditions, such as rhythmical  
21 bimanual finger tapping and bimanual drawing (Franz *et al.* 1996; Swinnen *et al.* 1998; Eliassen  
22 *et al.* 1999; Kennerley *et al.* 2002).

23         Rodents exhibit bimanual coordination when feeding; holding and manipulating food,  
24 and bringing the food to the mouth. However, experimental studies of bimanual coordination  
25 in rodents have been relatively limited to date. Recently, measurement techniques for bilateral

26 forelimb movements during spontaneous food handling have been developed using high-speed  
27 camera. These techniques enable the analysis of kinematic parameters of forelimb movements  
28 bilaterally (Igarashi and Wickens 2019). Therefore, it is now possible to address the hypothesis  
29 that the corpus callosum mediates bimanual movements by quantifying symmetric forelimb  
30 movement bilaterally in time and space.

31         In the present study, the contribution of the corpus callosum in bimanual coordination  
32 is investigated by measuring food handling behavior in head-fixed rats. Our working hypothesis  
33 is that the motor corpus callosum is important for symmetry in movements. To address this  
34 question, we identified motor pathways in the corpus callosum that connected the two forelimb  
35 motor areas in rats, and confirmed that this motor callosal connection was temporarily silenced  
36 by a sodium channel blocker. We then examined the effect of blockade of the anterior corpus  
37 callosum on bimanual coordination by 3-D kinematic analysis of feeding behavior. Kinematic  
38 analysis was used to test two specific hypotheses (i) the anterior corpus callosum mediates  
39 symmetry in forelimb movement speed; and, ii) the anterior corpus callosum mediates  
40 symmetry in forelimb movement direction. We found that suppressing the anterior corpus  
41 callosum connections altered the ratio of movement symmetry toward more asymmetry in  
42 movement direction. However, symmetry in movement speed was unchanged. Other aspects of  
43 skilled forelimb use, such as time of consumption, were unchanged. We suggest that the anterior  
44 corpus callosum is important for integrating spatial representation of two motor cortical  
45 forelimb areas to generate fine symmetric bimanual movements.

## 1 **Materials and methods**

### 2 **Animals.**

3 Thirty four Male Long Evan rats weighing 350-450 g were used in the study. Rats were kept  
4 under a reversed 12 hrs light/dark cycle, constant temperature and humidity with free access to  
5 water and food before food restriction. Animals were habituated to the experimenter for more  
6 than three days before the start of behavioral training. All experiments in the present study were  
7 approved by the Committee for Care and Use of Animals at the Okinawa Institute of Science  
8 and Technology.

9

### 10 **Tracing callosal fibers from forelimb motor areas.**

11 Eight rats were used to visualize the connections between the forelimb motor areas. These rats  
12 were anesthetized with isoflurane (4.0% induction, 1.5-2.0% maintenance). To visualize the  
13 axonal fiber bundle, 1,1'-Diiodo-3,3',3'-Tetramethylindocarbocyanine Perchlorate (DiI,  
14 Invitrogen, USA) was used as a non-viral neural tracer. 2% DiI solution was prepared by  
15 dissolving DiI crystals in 100% ethanol. 100 nL of the 2% DiI solution was then slowly injected  
16 into either rostral forelimb motor area (RFA) or caudal forelimb motor area (CFA) at 1 nl/sec  
17 (Nanoject III, Drummond Scientific). The coordinates for the RFA and CFA in male Long Evans  
18 rats were based on previous reports (Brown and Teskey 2014; Neafsey and Sievert 1982) (RFA:  
19 3.2 mm anterior and 2.3 mm lateral from bregma, 0.8 mm deep from cortical pia; CFA: 1.0 mm  
20 anterior and 2.5 mm lateral from bregma, 0.8 mm deep from cortical pia). Animals were kept  
21 alive for two weeks to allow for the diffusion of DiI. The rats were then euthanized with  
22 pentobarbital and perfused with 100 mL of heparin saline solution followed by 100 mL of 4%  
23 PFA in Phosphate Buffer (PB). Brains were removed and post-fixed with 4% PFA for 2 hours  
24 followed by two days of saturation in 30% sucrose PB solution. The brains were sectioned at  
25 100  $\mu$ m and the slices were then rinsed in PB and nuclear DNA was stained with the NucBlue™

26 Fixed Cell Stain using the manufacturer's protocol (Life Technologies, Grand Island, NY). The  
27 fluorescence of DiI and NucBlue™ were observed under a fluorescence microscope (BZ-9000,  
28 KEYENCE, Osaka, Japan) using DAPI and mCherry filters.

29

### 30 **In vivo anesthetized LFP recordings.**

31 Eight rats were used for recording of cortical local field potentials (LFPs). Animals were placed  
32 on a stereotaxic frame under isoflurane anesthesia (3.0% induction, 1.5% maintenance and  
33 recording). Two millimeters square craniotomies were made on both right and left sides of the  
34 skull centered on the central region of primary motor forelimb area in Long Evans rats (Neafsey  
35 and Sievert 1982; Brown and Teskey 2014) (0.5 mm anterior and 1.5mm lateral from the  
36 bregma). A 16-ch array silicone probe (A1x16-5mm-150-413, NeuroNexus, USA) was inserted  
37 to the depth of 2.2 mm from the pia to record LFPs from cortical laminae. A concentric bipolar  
38 stimulation electrode (CBARC\_75, FHC Inc., ME, USA) was slowly inserted 1.0 mm from the  
39 cortical pia contralateral to the silicone probe. A glass pipette connected to a microinjector was  
40 inserted into the anterior corpus callosum for the injection of sodium channel blocker (Nanoject  
41 III, Drummond Scientific, PA, USA, 0.5 mm anterior and 0.8 mm lateral from the bregma, 2.9  
42 mm deep from the cortical pia). A wideband signal was recorded using an OmniPlex D  
43 multichannel recording system (Plexon, TX, USA). The signal was filtered with a 200 Hz  
44 lowpass cutoff Bessel. Intracortical microstimulation (ICMS) was applied to measure cortico-  
45 cortical connections. Cathode-lead biphasic current pulses ( $\pm 150 \mu\text{A}$ , 1 ms) were applied every  
46 10 seconds using a programmable stimulus generator (STG4004, Multichannel Systems,  
47 Germany). The first 10 minutes were used for baseline. Immediately after the baseline, 500nL  
48 of 2% Lidocaine solution was injected at 1nL/sec and recordings were continued for 30 min.  
49 After completion of LFP recordings, rats were perfused with 4% PFA for histology, the brains  
50 were sectioned on a vibratome and stained with NucBlue™ or subjected to Nissl staining to  
51 show cells. Fluorogold and NucBlue™ were imaged under a fluorescence microscope (BZ-

52 9000, KEYENCE, Osaka, Japan) using DAPI and GFP filters.

53

#### 54 **Data analysis of LFP recording.**

55 The recorded continuous 16-ch LFP data set was segmented and realigned to the time onset of  
56 ICMS events to produce peri-stimulus LFP traces, using Neuro Explorer (Nex Technologies,  
57 MA, USA). The mean of peri-stimulus LFPs were then computed from every 10 minutes of  
58 recording. The largest sink of LFP among 16 channels was selected as the peak LFP response.  
59 To visualize current source density (CSD) profile, the mean peri-stimulus LFP traces were  
60 exported to MATLAB and inverted current source density (iCSD) plots were generated using  
61 iCSD plot toolbox for MATLAB distributed by Pettersen *et al.* (2006).

62

#### 63 **Surgery for head-fixation.**

64 Ten to twelve week old male rats weighing 350-450g were used for behavioral experiments.  
65 Rats were anesthetized with isoflurane (3 - 4% induction, 1.5 - 2.5 % maintenance), and placed  
66 on a stereotaxic frame (SR-10R-HT, Narishige, Japan). The detailed procedures of implantation  
67 of head-plate has been previously described (Igarashi and Wickens, 2018). Briefly, the skull  
68 was exposed and carefully cleaned with saline and cotton swabs. The eight anchor screws  
69 drilled to the skull were then covered with a layer of Super Bond (Sun Medical Inc., Japan). A  
70 chamber frame (CFR-1, Narishige, Japan) was positioned and secured by additional dental  
71 cement. Dietary supplement with Carprofen (Medigel CPF; Clear H<sub>2</sub>O, ME., US.) was given  
72 during post-op recovery for 5 days.

73

#### 74 **Spontaneous food handling under head-fixation.**

75 Rats were placed on the food deprivation protocol 1 week before habituation. Behavioral testing  
76 was conducted during the middle hours of the dark cycle (10am – 4 pm, reversed light cycle).  
77 At the time of testing, the last feed had been given to the animals on the previous day. Testing

78 was conducted on one animal at a time in a quiet room. Rats were habituated to the experimental  
79 chamber for three days, and gradually guided to the head attachment clamp by the experimenter  
80 using a sweet jelly reward (Igarashi and Wickens, 2018). To elicit bimanual motor behavior, a  
81 modified version of the spontaneous food handling task originally proposed by Whishaw and  
82 Coles (1996) was used. The annular shaped food reward (20 mm outer diameter, 10 mm inner  
83 diameter, 5 mm thickness, Fish Sausage, Marudai Food Co., Ltd, Japan) was used instead of  
84 vermicelli or pasta. Trials started with bimanual grasping of the food reward offered by the  
85 experimenter, and movements of the forelimbs during consumption were recorded. A successful  
86 trial was defined as complete consumption of a single food reward without dropping it. Rats  
87 underwent 6 trials in a day and continued for 6 days (Fig. 3). Cases where rats showed unusual  
88 behavior, such as adopting a tripod stance during eating, were excluded from further analysis.

89

#### 90 **Intracallosal drug infusion.**

91 After training, rats were anesthetized with 2% isoflurane, placed in a stereotaxic frame, and  
92 implanted with a stainless guide cannula (26G, 7mm, PlasticsOne, VA, USA) into the anterior  
93 part of the corpus callosum (1.0 mm anterior posterior and 0.8 mm lateral from bregma; 2.0  
94 mm ventral from cortical pia). Due to the blood vessels along the sagittal sinus, the cannula was  
95 placed 0.8 mm lateral from the midline. The cannula was fixed by dental cement (Super-Bond,  
96 Sun Medical Inc., Japan) and secured by a dummy cannula (7mm, PlasticsOne, VA, USA). A  
97 dietary supplement of Carprofen (Medigel CPF; Clear H<sub>2</sub>O, ME, USA) was given during post-  
98 op recovery for 5 days. 15 min prior to behavioral test sessions, 500 nl of 2% Lidocaine  
99 (dissolved in saline) was injected via an internal cannula (1.0 mm exposure from guide cannula)  
100 using a 10 µl gas tight syringe loaded on a syringe pump (KDS-101, KD Scientific Inc., MA,  
101 USA). Lidocaine was slowly injected at a rate of 1.67 nl/sec (5 min total) and the internal  
102 cannula was kept in position for 5 min to allow diffusion. After completing six sessions of  
103 behavioral experiments, rats were deeply anesthetized and perfused. The brains were sectioned



104 and the location of the tip of cannula was confirmed by Nissl staining.

105

### 106 **Recording of forelimb motor behavior and 3-D reconstruction.**

107 On the day of the behavioral recording, 3 mm diameter half-spherical reflective markers were  
108 attached to the lower side of the wrists with double-sided tape. Rats were head-fixed in the  
109 custom-made apparatus (SR-10R-HT, Narishige, Japan; Fig.). The reflective markers attached  
110 to the forelimb were tracked during food handling by two high-speed cameras (HAS-L1,  $f =$   
111 6mm, DITECT, Tokyo, Japan) positioned below the transparent acrylic floor. All trials were  
112 recorded at 200 frames per second (1/500s exposure time and 600x800 pixel) and stored to hard  
113 disk. The positions of reflective markers were semi-automatically traced and reconstructed  
114 using custom MATLAB programs (The MathWorks, Inc., MA., USA). The positions of the  
115 reflective markers were represented as a time series data in the camera coordinate  $[x, y, z]^T$ ,  
116 where  $x = [x_1, x_2, \dots, x_t]$ ,  $y = [y_1, y_2, \dots, y_t]$ ,  $z = [z_1, z_2, \dots, z_t]$ . The data  $[x, y, z]^T$  were  
117 transformed into the egocentric coordinate system  $[lr, ap, dv]^T$  using a reference frame based  
118 on the head-fixed apparatus (Igarashi and Wickens, 2018), where  $lr, ap, dv$  corresponds to  
119 time series data of marker position in left-right ( $lr$ ) axis, anterior-posterior ( $ap$ ) axis, and dorsal-  
120 ventral ( $dv$ ) respectively.

121

### 122 **Analysis of kinematic data.**

123 To analyze organization of bilateral forelimb coordination, laterality of movement speed and  
124 asymmetry in movement direction were computed as detailed by Igarashi and Wickens (2018).  
125 The kinematic data was analyzed by following three steps:

126

127 (1) *Detection of forelimb movements.* Rats demonstrated frequent transition between  
128 resting states and active use of forelimbs during food consumption. The active use of two  
129 forelimbs was detected by the maximum speed function  $\max(\bar{V}_R, \bar{V}_L)$ , where  $\bar{V}_R$  and  $\bar{V}_L$

130 are mean speed computed from  $[lr, ap, dv]^T$  by each 50 ms sliding time window. The  
131 threshold for detecting movement was set to  $\max(\bar{V}_R, \bar{V}_L) \geq 40$  ( $mm/sec$ ), that is, if  
132 mean speed of either left or right forelimb exceeded 40 mm/sec the time frame was defined  
133 as *movement*. This threshold value was previously validated (Igarashi and Wickens, 2018).  
134 Conversely, the resting state  $\max(\bar{V}_R, \bar{V}_L) < 40$  ( $mm/sec$ ) was excluded from further  
135 analysis.

136

137 (2) *Speed ratio*. The extracted active movements were further analyzed by the speed ratio

138 function  $\frac{\min\{\bar{V}_R, \bar{V}_L\}}{\max\{\bar{V}_R, \bar{V}_L\}}$ . The speed ratio function was used to compute synchronization of

139 movement speed across two forelimbs disregarding movement direction. The speed ratio

140 function uses the speed of left and right forelimbs  $\bar{V}_R$  and  $\bar{V}_L$  to calculate the ratio of the

141 larger value to the smaller value (e.g.  $\bar{V}_R/\bar{V}_L$  in the case of  $\bar{V}_R < \bar{V}_L$ ). SpeedRatio = 1

142 indicates that the speed of both forelimbs is identical (bilateral movement), whereas

143 a SpeedRatio = 0 suggests that the speed of one forelimb is zero (unilateral movement).

144 Bilateral and unilateral forelimb movements were detected by setting the threshold to 0.5.

145

146 (3) *Asymmetry index*. Asymmetry in movement direction was computed using an inverse

147 cosine similarity function  $\theta = \cos^{-1}\left(\frac{v_{R_M} \cdot v_L}{|v_{R_M}| |v_L|}\right)$ , where theta is a measure of the angle

148 between the movement vectors of the left forelimb  $v_L$  and the mirrored right forelimb

149  $v_{R_M}$ , which was obtained by mirror transformation of movement vector of the right

150 forelimb  $v_R$  with respect to the sagittal plane. The mean asymmetry index  $\bar{\theta}$  was

151 computed in each 50 ms sliding time window. For quantitative analysis of the asymmetry

152 index during behavioral testing, a threshold value of  $\pi/4$  (45 degree) was used to classify

153 movements into one of two categories: i) symmetric movements, ii) asymmetric

154 movements. Orthogonal lever pressing with two hands has previously been used as an

155 example of asymmetric bimanual movements, which is neurophysiologically significantly  
156 different from perfect symmetry (0 degree) (Cardoso de Oliveira *et al.* 2001). The present  
157 study used the value  $\pi/4$  which is intermediate between perfectly symmetric movement (0  
158 degree) and orthogonally asymmetric movements (90 degree).

159

160 Global scores of spontaneous food handling behavior were defined as follows: Mean  
161 speed of forelimbs was defined by the grand mean of movement speed in each trial. The rate of  
162 successful food consumption was calculated by the number of failed trials (a drop of food)  
163 divided by the total number of trials. The mean time of completion of food intake was the grand  
164 mean of the time spent on the consumption of single annular shaped food reward. The cross  
165 correlation between forelimbs was calculated from the cross-correlation of movement velocities  
166 between mirrored right forelimbs  $v_{R_M}$  and the left forelimb  $v_L$ .

## 1 **Results**

### 2 **Rat forelimb cortical motor areas project in anterior corpus callosum**

3 Previous work in humans has shown that the corpus callosum is functionally organized along  
4 the anteroposterior axis with respect to the origin of cortical areas (Doron and Gazzaniga 2008).  
5 In the present study the callosal bundle from the motor forelimb areas in rats was localized by  
6 injecting the neural tracer DiI into two forelimb motor areas: the rostral forelimb area (RFA)  
7 and the caudal forelimb area (CFA) (Fig. 1A). DiI positive axonal fibers could be clearly  
8 identified in their course through the corpus callosum (Fig. 1B). DiI positive fiber bundles from  
9 both CFA and RFA coursed mainly in the anterior part of the corpus callosum (Fig. 1C). The  
10 DiI positive fiber bundle of CFA were found posterior than RFA (Fig. 1C). Most of the callosal  
11 fibers from RFA and CFA were observed anterior to bregma (Fig. 1D). No DiI positive axonal  
12 fiber bundles were found in the posterior part of the corpus callosum (data not shown). These  
13 results suggest that in the rat brain, the motor components of the corpus callosum course mainly  
14 through the anterior parts of the corpus callosum.

15

### 16 **Local Lidocaine injection inactivates anterior corpus callosum.**

17 To study the causal role of neural signaling via the anterior corpus callosum, the local anesthetic  
18 Lidocaine was used to block axonal conduction in the corpus callosum. To validate the efficacy  
19 of Lidocaine *in vivo*, the efficacy of cortico-cortical axonal conductance was monitored by  
20 recording electrical stimulus-evoked population excitatory postsynaptic potential (pEPSP)  
21 responses. Intra-cortical current stimulation (ICMS) was delivered in the right motor cortex  
22 while recording pEPSPs on the side contralateral to the ICMS (Fig. 2A, B). The latency of the  
23 pEPSP response was 13.13 ms (Std. Deviation = 2.03 ms), which is consistent with previous  
24 reports measured by antidromic spike (Wilson 1987; Soma *et al.* 2017), suggesting the pEPSP  
25 evoked by the ICMS is monosynaptic. Next, the current source density (CSD) profile was

26 computed from the pEPSP traces. The CSD showed a significant sink (positive currents leaving  
27 extracellular medium) response at 1.05 mm from cortical pia (Std. Deviation = 0.30 mm). This  
28 shows the presence of an excitatory input from the contralateral cortex to cortical layers at a  
29 depth corresponding to layer 5. The ICMS-evoked sink response was maintained 30 min after  
30 saline injection (Fig. 2D). In contrast, 500nL of 2% Lidocaine injection significantly suppressed  
31 the sink amplitude (Fig. 2E). The suppression of the axonal conductance was observed from 10  
32 min after injection and was sustained for 25 minutes (Fig. 2F). These result show that the 2%  
33 Lidocaine injection was effective in suppressing the cortico-cortical synaptic transmission.  
34 Thus, 2% Lidocaine was used to investigate the role of anterior corpus callosum in bimanual  
35 coordination in the behavioral experiments.

36

### 37 **Pharmacological inactivation of anterior corpus callosum in awake rats.**

38 Rats were trained to perform spontaneous food handling under head-fixed conditions (Fig. 3A).  
39 Rats consumed an annularly shaped food reward (Fig. 3B) by manipulating it in both hands,  
40 and the variety of forelimb movements during feeding were recorded via reflective markers  
41 attached to their wrists (Fig. 3A and C). The reconstructed forelimb trajectories in 3-D  
42 egocentric coordinate space were used for kinematic analysis of bimanual movements (Fig. 3D).  
43 Eleven successfully trained rats were subject to Lidocaine injections into the anterior corpus  
44 callosum. Each rat underwent test sessions consisting of three repeated daily cycles of Saline  
45 and Lidocaine injection conditions (Fig. 3E). After completion of all behavioral sessions, the  
46 locations of injection cannulae were confirmed by histology (Fig. 3F - H). Nine of eleven rats  
47 successfully received Lidocaine injection into the anterior corpus callosum (Table 1) and these  
48 rats were therefore used in the following data analyses.

49

## 50 **No effect of anterior corpus callosum blockade on proportion of bilateral movements**

51 We first examined whether the blockade of the anterior corpus callosum affects the proportion  
52 of bilateral versus unilateral movement, based on the ratio of the faster to slower forelimb  
53 speeds (Fig. 4A). Bilateral movements were defined as those in which the slower forelimb  
54 moved with at least half the speed for the faster limb ( $SR \geq 0.5$ , Fig. 4B), and unilateral  
55 movements were defined as those in which the slower limb moved at less than half the faster  
56 limb ( $SR < 0.5$ , Fig. 4C) (Igarashi and Wickens 2019). The speed ratio was computed along  
57 with trajectories of forelimbs for all recorded trials of two conditions (Saline and Lidocaine,  
58 Fig.4D). As seen in the colored trajectories, the most time was spent in bilateral movement (Fig.  
59 4D). Quantitative analysis revealed that in the saline control group, 89.37 % of time movements  
60 were classified as bilateral (Fig. 4E), while the remaining 10.63% were unilateral movements  
61 (Fig. 4F). After injection of Lidocaine into the anterior corpus callosum, neither reduction nor  
62 increase was observed (Fig. 4E,F). These results suggest that the anterior corpus callosum does  
63 not mediate the balance of movement speed between two forelimbs during feeding behavior.

64

## 65 **Anterior corpus callosum plays role in symmetric forelimb movements.**

66 Next, we tested the effect of the attenuation of anterior corpus callosum on symmetry in  
67 movement direction during spontaneous food manipulation. To measure symmetry in  
68 movement direction, the asymmetry index was used (Igarashi and Wickens 2019). The velocity  
69 of left forelimb and the mirrored right forelimb was used to compute the asymmetry index,  
70 represented as the angle  $\theta$  between the movement vectors of the forelimbs (Fig. 5A). The  
71 asymmetry index values were calculated over the 3D trajectories (Fig. 5D). Quantitative  
72 analysis revealed that in saline control group 57.17 % of the time movements were classified  
73 as symmetric ( $\bar{\theta} \leq \pi/4$ , Fig. 4E), and the remaining 42.83% were classified as asymmetric  
74 ( $\bar{\theta} > \pi/4$ , Fig. 4F), which was consistent with our previous report (Igarashi and Wickens 2019).  
75 After injection of Lidocaine into the anterior corpus callosum, a reduction of symmetric

76 movements was observed. The fraction of time in the symmetric mode decreased to 53.87 %  
77 (Fig. 4E), and in turn, asymmetric movement increased (46.13 %, Fig. 4E). The finding of  
78 reduction of symmetric movements was robust in the face of variations in the parameters of the  
79 sliding time window used for segmentation (supplemental figure 2). The reduction of  
80 symmetric movements was not observed in a naïve control group (supplemental figure 3). These  
81 results suggest that the anterior corpus callosum plays an important role in symmetric bilateral  
82 forelimb movements during spontaneous food handling behavior.

83

#### 84 **Effect of anterior corpus callosum blockade on global motor function.**

85 The suppression of anterior corpus callosum neurotransmission had no significant effect on task  
86 performance or measures such as mean consumption time and success rate (supplemental figure  
87 1A,B). There was also no effect of variation in injection location on mean forelimb movement  
88 speed, suggesting that the Lidocaine injection did not cause motor disability of forelimb by  
89 spreading to the motor cortex adjacent to the injection (supplemental figure 1C,D).

## 1 **Discussion**

2 The role of corpus callosum in bimanual coordination was examined by analyzing forelimb  
3 kinematics during object manipulation, before and after pharmacological suppression of the  
4 anterior corpus callosum. Neural tracing showed that the fiber bundle from the forelimb motor  
5 areas in rats passes through the anterior portion of the corpus callosum. We confirmed with  
6 electrophysiology that neural transmission in the anterior transcortical pathway was attenuated  
7 by injections of local anesthetic, which reduced the LFP response evoked by ICMS of the  
8 contralateral hemisphere. Kinematics of forelimb movements with and without suppression of  
9 the anterior corpus callosum were then compared during bimanual food handling. Suppression  
10 of the anterior corpus callosum decreased the fraction of forelimb movements that were  
11 bilaterally symmetric, whereas the balance of movements speed timing and other global scores  
12 were unchanged. These results suggest that the anterior corpus callosum contributes to  
13 symmetry in the form of bilateral forelimb movements. To our knowledge, this is the first study  
14 to investigate the role of the rodent motor corpus callosum in bimanual coordination, extending  
15 previous knowledge of the role of corpus callosum in bimanual coordination in daily feeding  
16 behavior.

17

18 Studies of the location of motor fibers in the corpus callosum of human, using diffusion tensor  
19 imaging, have shown that the callosal motor fibers are found from the anterior part (genu) to  
20 the posterior body and isthmus of the corpus callosum (de Lacoste *et al.* 1985; Hofer and Frahm  
21 2006; Wahl *et al.* 2007; Gooijers and Swinnen 2014). In the present study, the location of  
22 callosal motor fibers of rats was studied using a neural tracer. The results suggest that the  
23 callosal motor fibers of rats are most dense in the anterior part of the corpus callosum. The RFA  
24 callosal motor fibers ran more anteriorly than the CFA callosal motor fibers. This result is  
25 consistent with the projection map of the *Allen Mouse Brain Connectivity Atlas*



26 (<http://connectivity.brain-map.org>, Oh *et al.*, 2014), which shows that mouse motor areas are  
27 connected by the anterior part of corpus callosum. Therefore, the anterior corpus callosum was  
28 targeted in the present study.

29

30 In order to reversibly block axonal conduction of the corpus callosum, without altering the  
31 neurons of origin, lidocaine was injected into the anterior corpus callosum. The blockade of  
32 axonal conduction was confirmed by ICMS and LFP recordings. Control records showed that  
33 a significant sink response across cortical laminar in the homotopic cortex contralateral to  
34 ICMS, with a maximum at a level corresponding to layer 5, which is consistent with previous  
35 report in the sensorimotor cortex of rats (Chapman *et al.* 1998). Since 99% of the axonal fibers  
36 of the corpus callosum are excitatory fibers which originate from glutamatergic  
37 intratelencephalic neurons (Shepherd 2013; Harris and Shepherd 2015), the sink responses in  
38 the present study almost certainly reflects excitatory inputs from the contralateral cortex to these  
39 layers. There remains, however, a theoretical possibility that the evoked sink might be caused  
40 by polysynaptic events such as peripheral inhibitory inputs mediated by the callosal-interneuron  
41 pathway (Palmer *et al.* 2012; Kokinovic and Medini 2018), or other indirect components via  
42 posterior part of cerebral cortices. We found the latency of the response is consistent with  
43 previous reports measured by antidromic spike (Wilson 1987; Soma *et al.* 2017), suggesting  
44 that the sink observed in the present study is indeed caused by monosynaptic excitatory synaptic  
45 inputs. Injecting lidocaine into the anterior corpus callosum significantly suppressed the sink  
46 of LFP, confirming that axonal conduction was blocked in the direct excitatory interhemispheric  
47 connection between homotopic motor cortical areas. Taken together, we suggest that the  
48 lidocaine lesion effectively attenuates the excitatory interhemispheric connections.

49

50 In the present study, pharmacological blockade of axonal conduction was used instead of corpus  
51 callosotomy, which has been a widely in previous studies of the role of interhemispheric

52 communication in rodents (Mohn and Russell 1981; Noonan and Axelrod 1992; Sullivan *et al.*  
53 1993; Li *et al.* 2016) and non-human primates (Mark and Sperry 1968). In human, patients  
54 received callosotomy as treatment of seizure have been subject to test the role of corpus  
55 callosum in visual perception (Gazzaniga *et al.* 1962), and motor control (Franz *et al.* 1996;  
56 Ivry and Hazeltine 1999; Franz *et al.* 2000; Kennerley *et al.* 2002). The pharmacological  
57 blockade has the advantage of being reversible. In the present study two rats showed recovery  
58 from suppression approximately 30 min after the Lidocaine injection, which provided rapid  
59 reversibility of the pharmacological suppression of the corpus callosum. For studies requiring  
60 longer duration of suppression, longer-acting sodium channel blockers, such as QX-314, are  
61 available (Binshtok *et al.* 2009).

62

63 In the present study, inhibition of aCC did not alter the ratio of bilateral to unilateral movement  
64 during food handling, suggesting the balance of movement speed between two forelimbs was  
65 not changed. During food handling, the speed forelimb movements were well-synchronized,  
66 which is represented as predomination of bilateral movements, as previously reported (Igarashi  
67 and Wickens 2018). The predomination of bilateral synchronization has been reported in the  
68 studies done by human. For example, in human, synchrony of movement timing can be  
69 observed in rhythmic bimanual finger tapping; and the in-phase mode (simultaneous finger  
70 tapping with no phase shift;  $\phi = 0^\circ$ ) is more stable than anti-phase mode (tapping with  
71 alternation;  $\phi = 180^\circ$ ) (Yamanishi *et al.* 1980; Schoner and Kelso 1988). Interestingly, the  
72 bilateral synchrony of temporal coupling was well-preserved in callosotomy patients (Tuller  
73 and Kelso 1989; Ivry and Hazeltine 1999). Donchin *et al.* (1999) proposed the involvement of  
74 a subcortical structure, a central pattern generator (CPG), in synchronizing bimanual  
75 movements. This proposal might explain how conserved timing synchrony is possible without  
76 corpus callosum, because this would leave a subcortical CPG intact. However, there remain  
77 unknown whether the predomination of bilateral movements during spontaneous feeding in

78 rodents and the timing synchronization during rhythmic bimanual task in human are mediated  
79 by the similar neural substrates. Further investigation is needed to understand how rodents  
80 achieve bilateral control of movements speed in a highly balanced manner without motor-motor  
81 interhemispheric connection.

82

83 In contrast, inhibition of aCC by Lidocaine reduced the symmetry of bilateral forelimb  
84 movements. A possible interpretation of this reduction of movement symmetry is that the corpus  
85 callosum is necessary for the symmetry of bimanual movements. Humans exhibit a tendency  
86 toward spatially symmetric movements during bimanual tasks (Franz 1997; Swinnen *et al.*  
87 1998; Walter *et al.* 2001). There is evidence that this depends on the corpus callosum. Spatial  
88 coupling in a bimanual drawing task (drawing of different forms by two hands) was reduced in  
89 split-brain patients (Franz *et al.* 1996). In addition, disruption of temporal synchrony in split-  
90 brain patient became evident when the task involved spatial requirements in addition to timing  
91 (e.g., continuously drawing circle in a 2-D plane) (Kennerley *et al.* 2002), suggesting that the  
92 symmetric form of bilateral forelimb movements is mediated by corpus callosum in humans,  
93 consistent with the present results obtained in rats during natural eating behavior. In rats, the  
94 present study suggests that the frequent symmetrical upward and downward bimanual reaching  
95 action that occurs in feeding may be mediated by the anterior corpus callosum. However, it still  
96 remains unclear whether the symmetric movements mediated by the corpus callosum are  
97 responsible for the specific motor pattern of bimanual acts, such as upward bimanual reaching  
98 during food-to-mouth behavior, and downward bimanual reaching during tearing of food.  
99 Further work is needed to address this issue.

100

101 The mechanism underlying the contribution of the corpus callosum to symmetric bimanual  
102 movements is not well understood at the cellular level. It has been unclear whether the  
103 connection is functionally excitatory or inhibitory. For example, the attenuation of the spread

104 of seizure and loss of information integration in split-brain patients suggests that the corpus  
105 callosum is used for excitatory interhemispheric signal transmission (Gazzaniga *et al.* 1962;  
106 Spencer *et al.* 1988; Fuiks *et al.* 1991). Repeated stimulation to corpus callosum (kindling  
107 stimulation) forms bilateral representation in rat forelimb motor area supporting the excitatory  
108 role of corpus callosum (Teskey *et al.* 2002). The purpose of such a connection in motor  
109 function is not yet known. One possibility is suggested by the proposal of Li *et al.* (2016), in  
110 the form of a modular attractor model comprised of independent modules encoding particular  
111 actions. In the model, callosal excitatory connections link homotopic modules in each  
112 hemisphere. Given the existence of topographical maps related to forelimb movement form  
113 (Young *et al.* 2011; Brown and Teskey 2014) and direction (Hira *et al.* 2015), linking these  
114 across hemispheres might contribute to spatially symmetric movement. The effect of the lesion  
115 on the extent of symmetric movement might then make sense if these excitatory callosal  
116 projections are connected to functionally homotopic areas across motor cortices.

117 On the other hands, it has been postulated that the corpus callosum inhibits neurons in  
118 the contralateral hemisphere (interhemispheric inhibition, IHI) (Ferbert *et al.* 1992; Hubers *et*  
119 *al.* 2008). At the cellular level, IHI would result from dysynaptic connections involving  
120 inhibitory interneuron activated by excitatory inputs of the corpus callosum (Palmer *et al.* 2012;  
121 Kokinovic and Medini 2018). The electrical stimulation of corpus callosum causes EPSP in the  
122 sensorimotor cortex followed by IPSP (Chapman *et al.* 1998; Teskey *et al.* 1999). The functional  
123 significance of such inhibition is suggested by experiments in which cooling of contralateral  
124 somatosensory cortex unmasked larger receptive field, therefore, less selective to sensory inputs  
125 (Clarey *et al.* 1996). A similar report has been reported in rats (Pluto *et al.* 2005). These are  
126 consistent with the idea that the callosal connection provides a source of inhibition for shaping  
127 the finer receptive field. It should be noted, however, that the excitatory model and inhibitory  
128 model are not mutually exclusive. Rather both excitatory and inhibitory connections might play  
129 important roles in activating the contralateral motor cortex to perform finer bilateral forelimb

130 movements accurately by inactivating unnecessary movements.

131

132 The present kinematic analysis revealed a reduction of symmetric bimanual movements by  
133 blockade of aCC, however, the rats were still able to perform the food handling under head-  
134 fixation without significant reduction in mean consumption time and successful completion rate.  
135 This raises the question of why the blockage of the aCC did not significantly modify bimanual  
136 eating behavior. As described above, prior studies in primates demonstrated that the corpus  
137 callosum plays an important role in bimanual coordination in a variety of tasks. However, it has  
138 been reported that callosotomy patients had less difficulty in familiar bimanual actions such as  
139 tying a shoe and opening drawer (Franz *et al.* 2000; Serrien *et al.* 2001). Therefore, it is possible  
140 that the corpus callosum is not crucial for the execution of familiar bimanual actions such as  
141 food handling. Nevertheless, information exchange between the two sides of the body is  
142 necessary for highly synchronized movement direction, and the present study suggests that this  
143 is mediated by the aCC.

1 **Acknowledgment**

- 2 This work was supported by Japan Society for the Propotion of Science Reserch Fellow Grant-  
3 in-Aid 16J05329.

## 1 **References**

- 2 Binshtok AM, Gerner P, Oh SB, Puopolo M, Suzuki S, Roberson DP, Herbert T, Wang CF, Kim D,  
3 Chung G, Mitani AA, Wang GK, Bean BP, Woolf CJ. 2009. Coapplication of lidocaine and the  
4 permanently charged sodium channel blocker QX-314 produces a long-lasting nociceptive  
5 blockade in rodents. *Anesthesiology*. 111:127-137.
- 6 Boldrey E, Penfield W. 1937. Somatic motor and sensory representation in the cerebral cortex of  
7 man as studied by electrical stimulation. *Brain*. 60:389-443.
- 8 Brinkman C. 1981. Lesions in supplementary motor area interfere with a monkey's performance of  
9 a bimanual coordination task. *Neurosci Lett*. 27:267-270.
- 10 Brown AR, Teskey GC. 2014. Motor cortex is functionally organized as a set of spatially distinct  
11 representations for complex movements. *J Neurosci*. 34:13574-13585.
- 12 Cardoso de Oliveira S, Gribova A, Donchin O, Bergman H, Vaadia E. 2001. Neural interactions  
13 between motor cortical hemispheres during bimanual and unimanual arm movements. *Eur J*  
14 *Neurosci*. 14:1881-1896.
- 15 Chapman CA, Trepel C, Ivanco TL, Froc DJ, Wilson K, Racine RJ. 1998. Changes in field potentials  
16 and membrane currents in rat sensorimotor cortex following repeated tetanization of the corpus  
17 callosum in vivo. *Cereb Cortex*. 8:730-742.
- 18 Clarey JC, Tweedale R, Calford MB. 1996. Interhemispheric modulation of somatosensory receptive  
19 fields: evidence for plasticity in primary somatosensory cortex. *Cereb Cortex*. 6:196-206.
- 20 de Lacoste MC, Kirkpatrick JB, Ross ED. 1985. Topography of the human corpus callosum. *J*  
21 *Neuropathol Exp Neurol*. 44:578-591.
- 22 Donchin O, de Oliveira SC, Vaadia E. 1999. Who tells one hand what the other is doing: the  
23 neurophysiology of bimanual movements. *Neuron*. 23:15-18.
- 24 Doron KW, Gazzaniga MS. 2008. Neuroimaging techniques offer new perspectives on callosal  
25 transfer and interhemispheric communication. *Cortex*. 44:1023-1029.
- 26 Eliassen JC, Baynes K, Gazzaniga MS. 1999. Direction information coordinated via the posterior  
27 third of the corpus callosum during bimanual movements. *Exp Brain Res*. 128:573-577.
- 28 Ferbert A, Priori A, Rothwell JC, Day BL, Colebatch JG, Marsden CD. 1992. Interhemispheric  
29 inhibition of the human motor cortex. *J Physiol*. 453:525-546.
- 30 Franz EA. 1997. Spatial coupling in the coordination of complex actions. *Q J Exp Psychol A*. 50:684-  
31 704.
- 32 Franz EA, Eliassen JC, Ivry RB, Gazzaniga MS. 1996. Dissociation of Spatial and Temporal  
33 Coupling in the Bimanual Movements of Callosotomy Patients. *Psychol Sci*. 7:306-310.
- 34 Franz EA, Waldie KE, Smith MJ. 2000. The effect of callosotomy on novel versus familiar bimanual  
35 actions: a neural dissociation between controlled and automatic processes? *Psychol Sci*. 11:82-  
36 85.
- 37 Fuiks KS, Wyler AR, Hermann BP, Somes G. 1991. Seizure outcome from anterior and complete  
38 corpus callosotomy. *J Neurosurg*. 74:573-578.

- 39 Gazzaniga MS, Bogen JE, Sperry RW. 1962. Some functional effects of sectioning the cerebral  
40 commissures in man. *PNAS*. 48:1765-1769.
- 41 Gooijers J, Swinnen SP. 2014. Interactions between brain structure and behavior: The corpus  
42 callosum and bimanual coordination. *Neurosci Biobehav Rev*. 43:1-19.
- 43 Gooijers J, Swinnen SP. 2014. Interactions between brain structure and behavior: the corpus  
44 callosum and bimanual coordination. *Neurosci Biobehav Rev*. 43:1-19.
- 45 Harris KD, Shepherd GMG. 2015. The neocortical circuit: themes and variations. *Nat Neurosci*.  
46 18:170-181.
- 47 Hira R, Terada S-I, Kondo M, Matsuzaki M. 2015. Distinct Functional Modules for Discrete and  
48 Rhythmic Forelimb Movements in the Mouse Motor Cortex. *J Neurosci*. 35:13311-13322.
- 49 Hofer S, Frahm J. 2006. Topography of the human corpus callosum revisited—Comprehensive fiber  
50 tractography using diffusion tensor magnetic resonance imaging. *NeuroImage*. 32:989-994.
- 51 Hubers A, Orekhov Y, Ziemann U. 2008. Interhemispheric motor inhibition: its role in controlling  
52 electromyographic mirror activity. *Eur J Neurosci*. 28:364-371.
- 53 Igarashi M, Wickens J. 2019. Kinematic analysis of bimanual movements during food handling by  
54 head-fixed rats. *J Neurophysiol*. 121:490-499.
- 55 Igarashi M, Wickens JR. 2018. Kinematic analysis of bimanual movements during food handling  
56 by head-fixed rats. *J Neurophysiol*.
- 57 Ivry RB, Hazeltine E. 1999. Subcortical locus of temporal coupling in the bimanual movements of  
58 a callosotomy patient. *Hum Mov Sci*. 18:345-375.
- 59 Kennerley SW, Diedrichsen J, Hazeltine E, Semjen A, Ivry RB. 2002. Callosotomy patients exhibit  
60 temporal uncoupling during continuous bimanual movements. *Nat Neurosci*. 5:376-381.
- 61 Kokinovic B, Medini P. 2018. Loss of GABAB $\gamma$ -mediated interhemispheric synaptic inhibition in  
62 stroke periphery. *J Physiol*. 596:1949-1964.
- 63 Li N, Daie K, Svoboda K, Druckmann S. 2016. Robust neuronal dynamics in premotor cortex during  
64 motor planning. *Nature*.
- 65 Mark RF, Sperry RW. 1968. Bimanual coordination in monkeys. *Experimental neurology*. 21:92-104.
- 66 Mohn G, Russell IS. 1981. The role of the corpus callosum and some subcortical commissures in  
67 interocular transfer in the hooded rat. *Exp Brain Res*. 42:467-474.
- 68 Neafsey EJ, Sievert C. 1982. A second forelimb motor area exists in rat frontal cortex. *Brain Res*.  
69 232:151-156.
- 70 Noonan M, Axelrod S. 1992. Partial callosotomy and left-right response differentiation in the rat:  
71 separate anterior and posterior facilitatory effects. *Behav Neurosci*. 106:433-436.
- 72 Oh SW, Harris JA, Ng L, Winslow B, Cain N, Mihalas S, Wang Q, Lau C, Kuan L, Henry AM,  
73 Mortrud MT, Ouellette B, Nguyen TN, Sorensen SA, Slaughterbeck CR, Wakeman W, Li Y, Feng  
74 D, Ho A, Nicholas E, Hirokawa KE, Bohn P, Joines KM, Peng H, Hawrylycz MJ, Phillips JW,  
75 Hohmann JG, Wahnoutka P, Gerfen CR, Koch C, Bernard A, Dang C, Jones AR, Zeng H. 2014.  
76 A mesoscale connectome of the mouse brain. *Nature*. 508:207.



- 77 Palmer LM, Schulz JM, Murphy SC, Ledergerber D, Murayama M, Larkum ME. 2012. The cellular  
78 basis of GABA(B)-mediated interhemispheric inhibition. *Science*. 335:989-993.
- 79 Pettersen KH, Devor A, Ulbert I, Dale AM, Einevoll GT. 2006. Current-source density estimation  
80 based on inversion of electrostatic forward solution: effects of finite extent of neuronal activity  
81 and conductivity discontinuities. *J Neurosci Methods*. 154:116-133.
- 82 Pluto CP, Chiaia NL, Rhoades RW, Lane RD. 2005. Reducing contralateral SI activity reveals  
83 hindlimb receptive fields in the SI forelimb-stump representation of neonatally amputated rats.  
84 *J Neurophysiol*. 94:1727-1732.
- 85 Schonher G, Kelso JA. 1988. Dynamic pattern generation in behavioral and neural systems. *Science*.  
86 239:1513-1520.
- 87 Serrien DJ, Nirkko AC, Wiesendanger M. 2001. Role of the corpus callosum in bimanual  
88 coordination: a comparison of patients with congenital and acquired callosal damage. *Eur J*  
89 *Neurosci*. 14:1897-1905.
- 90 Shepherd GM. 2013. Corticostriatal connectivity and its role in disease. *Nature reviews*  
91 *Neuroscience*. 14:278-291.
- 92 Soma S, Saiki A, Yoshida J, Ríos A, Kawabata M, Sakai Y, Isomura Y. 2017. Distinct laterality in  
93 forelimb-movement representations of rat primary and secondary motor cortical neurons with  
94 intratelencephalic and pyramidal tract projections. *J Neurosci*.
- 95 Spencer SS, Spencer DD, Williamson PD, Sass K, Novelly RA, Mattson RH. 1988. Corpus  
96 callosotomy for epilepsy. *Neurology*. 38:19.
- 97 Sullivan RM, Parker BA, Szechtman H. 1993. Role of the corpus callosum in expression of  
98 behavioral asymmetries induced by a unilateral dopamine lesion of the substantia nigra in the  
99 rat. *Brain Res*. 609:347-350.
- 100 Swinnen SP, Jardin K, Verschueren S, Meulenbroek R, Franz L, Dounskaia N, Walter CB. 1998.  
101 Exploring interlimb constraints during bimanual graphic performance: effects of muscle  
102 grouping and direction. *Behav Brain Res*. 90:79-87.
- 103 Teskey GC, Hutchinson JE, Kolb B. 1999. Sex Differences in Cortical Plasticity and Behavior  
104 Following Anterior Cortical Kindling in Rats. *Cereb Cortex*. 9:675-682.
- 105 Teskey GC, Monfils MH, VandenBerg PM, Kleim JA. 2002. Motor map expansion following repeated  
106 cortical and limbic seizures is related to synaptic potentiation. *Cereb Cortex*. 12:98-105.
- 107 Tuller B, Kelso JA. 1989. Environmentally-specified patterns of movement coordination in normal  
108 and split-brain subjects. *Exp Brain Res*. 75:306-316.
- 109 Vega-González A, Granat MH. 2005. Continuous monitoring of upper-limb activity in a free-living  
110 environment. *Arch Phys Med Rehabil*. 86:541-548.
- 111 Wahl M, Lauterbach-Soon B, Hattingen E, Jung P, Singer O, Volz S, Klein JC, Steinmetz H,  
112 Ziemann U. 2007. Human Motor Corpus Callosum: Topography, Somatotopy, and Link between  
113 Microstructure and Function. *J Neurosci*. 27:12132.
- 114 Walter CB, Swinnen SP, Dounskaia N, Langendonk H. 2001. Systematic error in the organization

- 115 of physical action. *Cognitive Science*. 25:393-422.
- 116 Whishaw IQ, Coles BL. 1996. Varieties of paw and digit movement during spontaneous food  
117 handling in rats: postures, bimanual coordination, preferences, and the effect of forelimb cortex  
118 lesions. *Behav Brain Res*. 77:135-148.
- 119 Wilson CJ. 1987. Morphology and synaptic connections of crossed corticostriatal neurons in the rat.  
120 *J Comp Neurol*. 263:567-580.
- 121 Yamanishi J-i, Kawato M, Suzuki R. 1980. Two coupled oscillators as a model for the coordinated  
122 finger tapping by both hands. *Biol Cybern*. 37:219-225.
- 123 Young NA, Vuong J, Flynn C, Teskey GC. 2011. Optimal parameters for microstimulation derived  
124 forelimb movement thresholds and motor maps in rats and mice. *J Neurosci Methods*.  
125 196:6069.

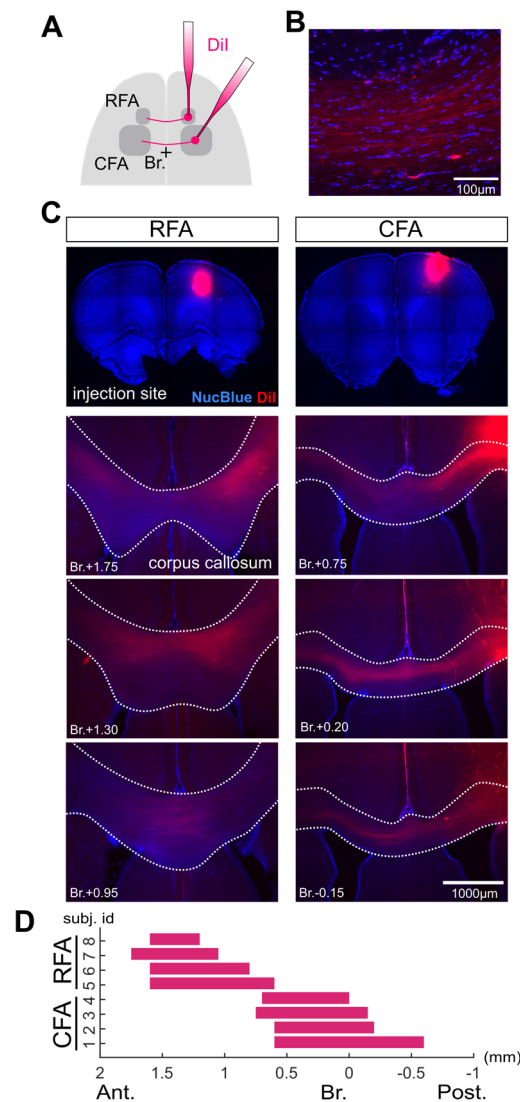

1

## 2 **Figure 1. Motor fibers in anterior corpus callosum.**

3 (A) Schematic diagram of callosal axon fiber bundle labeling by 1,1'-dioctadecyl-3,3,3',3'-

4 tetramethylindocarbocyanine perchlorate (DiI). Axonal projections from two forelimb areas

5 were labelled by an injection of DiI in either the rostral forelimb area or the caudal forelimb

6 area. (B) Representative microimage showing DiI positive callosal fibers from CFA. (C)

7 Anteroposterior profile of motor callosal path. Top row. Panels show the injection site in the

8 RFA (left) and CFA (right). Rows 2-4 show the DiI positive callosal projection from RFA and

9 CFA through the anterior part of the corpus callosum. (D) Summary of the anteroposterior

10 location of axonal fiber bundle projection from CFA (n = 4, subject id 1, 2, 3, 4) and RFA (n =

11 4, subject id 5, 6, 7, 8).

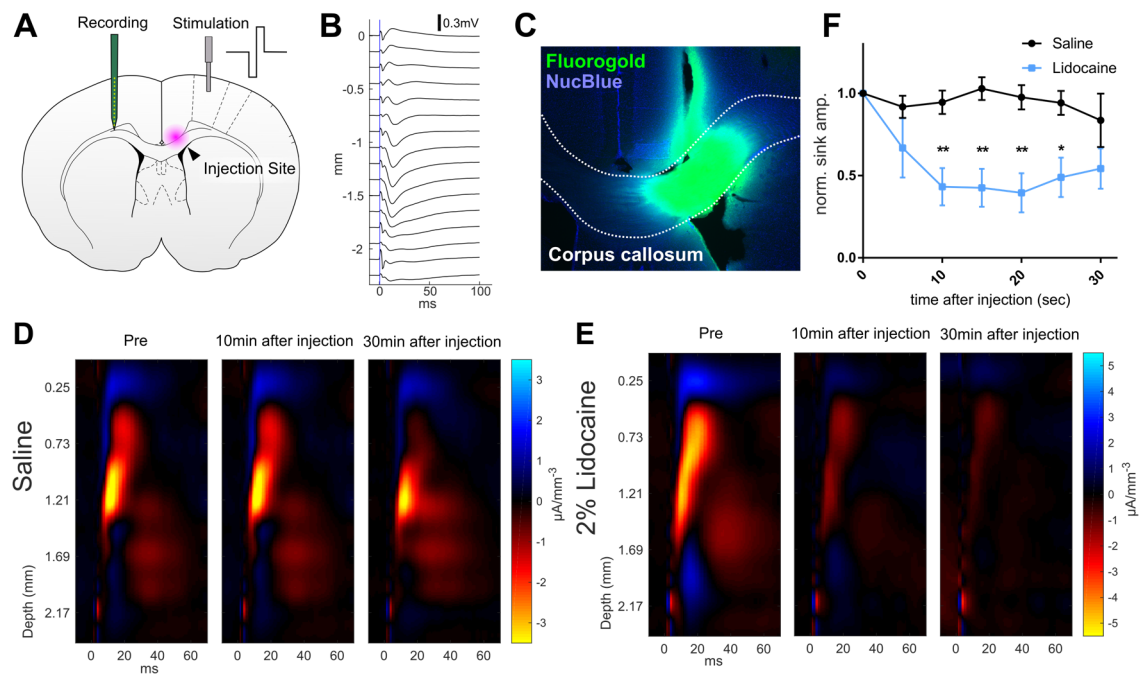

1

2 **Figure 2. Lidocaine suppresses cortico-cortical signal transmission.**

3 (A) Schematic diagram of *in vivo* LFP recording. The stimulation electrode was placed in motor  
4 cortex, and the recording electrode was placed in the contralateral motor cortex. Lidocaine was  
5 locally injected into the anterior corpus callosum. (B) Mean pEPSPs at different cortical depths  
6 evoked by electrical stimulation (vertical blue line) of contralateral homotopic cortex. (C)  
7 Example of spread of solution from the injection site, visualized using 500 nL of FluoroGold  
8 (green) as an injected tracer. (D, E) Current source density (CSD) profiles corresponding to the  
9 recorded LFP across cortical depths. Negative current source was generated immediately after  
10 the onset of electrical stimulation. (D) Stimuli evoked CSD after saline injection to the corpus  
11 callosum. (E) Significant attenuation of stimulus evoked CSD response after Lidocaine  
12 injection. (F) Time course of normalized peak CSD sink response over 30 min period after  
13 Lidocaine injection. Significant attenuation of evoked responses was caused by the Lidocaine  
14 injection from 10 min to 25 min after injection (two-way ANOVA ( $F(1,6) = 22.57$ ;  $p=0.0032$ )  
15 followed by Bonferroni's multiple comparisons test (\*\*  $p < 0.01$ , \*  $p < 0.05$ ). The error bars are  
16  $\pm$  SEM.

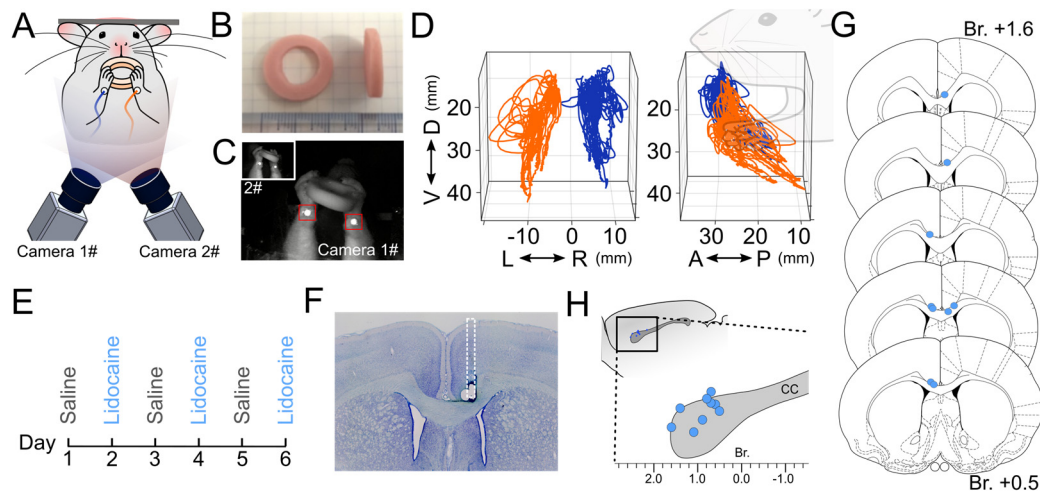

1

2 **Figure 3. Pharmacological suppression of aCC by Lidocaine in awake rats.**

3 (A) Schematic diagram of recording system of forelimb motor behavior. Rats were placed in a  
4 head-fixing apparatus with transparent floor. (B) Food rewards were presented and consumed  
5 within the apparatus. (C) Forelimb motor behaviors were monitored during food consumption  
6 by two high-speed cameras placed below, with reflective markers attached to the lower side of  
7 each wrists. (D) Forelimb trajectories were traced by automatic detection of reflective markers  
8 and post-hoc 3-D reconstruction of the marker position. The positions of left (orange) and right  
9 (blue) forelimbs during food consumption are shown, viewed from the back (left panel) and  
10 side (right panel). Note the 3D trajectories were projected in a body centered (egocentric)  
11 coordinate frame. (E) Experiment schedule of behavioral recordings. Test sessions consisted of  
12 three repeated day-long cycles of conditions under baseline (Saline), and inhibition of anterior  
13 corpus callosum (Lidocaine) with more than 24 hr interval between days. (F) Verification of  
14 cannula implantation. The location of the tip of cannula was confirmed by Nissl staining. (G)  
15 Schematic of injection sites shown in coronal sections. (H) injection sites shown in sagittal  
16 plane. D, dorsal; V, ventral; A, anterior; P, posterior; R, right; L, left.

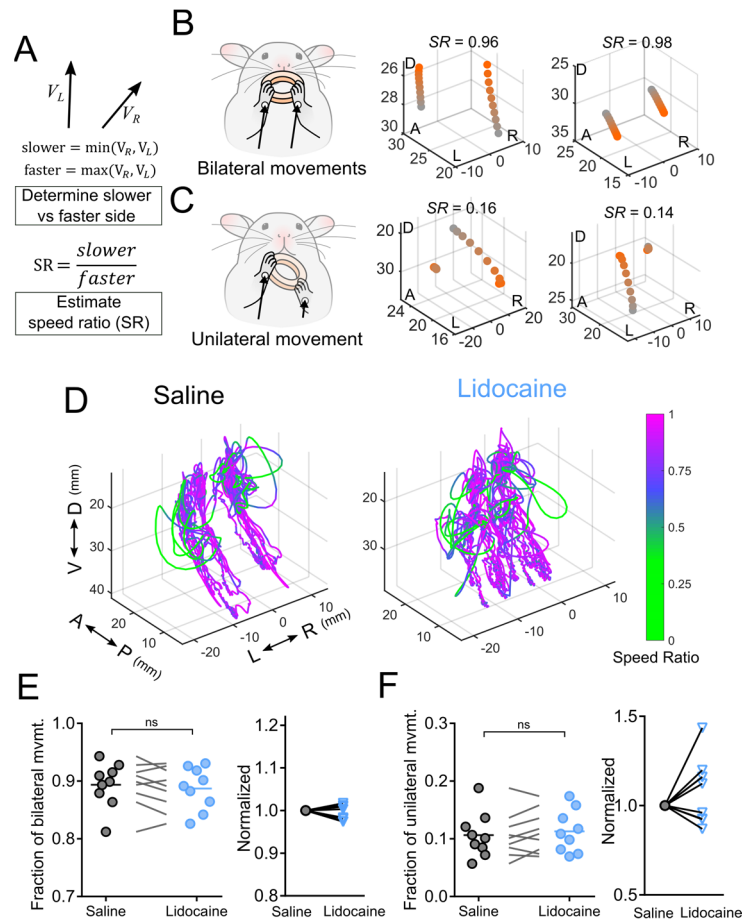

1

2 **Figure 4. Anterior corpus callosum does not mediate the balance of movement speed**  
 3 **between forelimbs during feeding behavior.**

4 (A-C) Kinematic data were analyzed by speed ratio function to calculate balance in movement  
 5 speed between left and right forelimb. (A) Speed ratio computed the ratio of faster and slower  
 6 forelimb speeds. Higher speed ratio indicates the speed closer in two forelimb. (B) Schematic  
 7 drawing of bilateral forelimb movements (left panel). The displacements of forelimb are not  
 8 significantly different across two forelimbs. Representative example of forelimb trajectory  
 9 segment in bilateral mode showing  $SR \geq 0.5$  (middle and right panel). (C) Unilateral forelimb  
 10 movements (left panel). The displacement of one side is significantly greater than the  
 11 contralateral forelimb. Two representative examples of forelimb trajectory segment in unilateral  
 12 mode showing  $SR < 0.5$  (middle and right panel). (D) Forelimb trajectories of saline (left) and  
 13 Lidocaine (right) injected group. The speed ratio was overlain on the 3D trajectories in color  
 14 scale. (E-F) Time fraction on unilateral and bilateral forelimb movements were unchanged. (E)

15 Quantitative analysis of the fraction of time spent on bilateral movements ( $SR \geq 0.5$ ) during  
16 food consumption (left), and the normalized change (right) (paired t-test,  $p = 0.2326$ ,  $n = 9$ ). (F)  
17 Quantitative analysis of the fraction of time spent on unilateral movements ( $SR < 0.5$ ) during  
18 food consumption (left), and the normalized change (right) (paired t-test,  $p = 0.2326$ ,  $n = 9$ ). D,  
19 dorsal; V, ventral; A, anterior; P, posterior; R, right; L, left. Numbers in 3-D plots are expressed  
20 in millimeters.



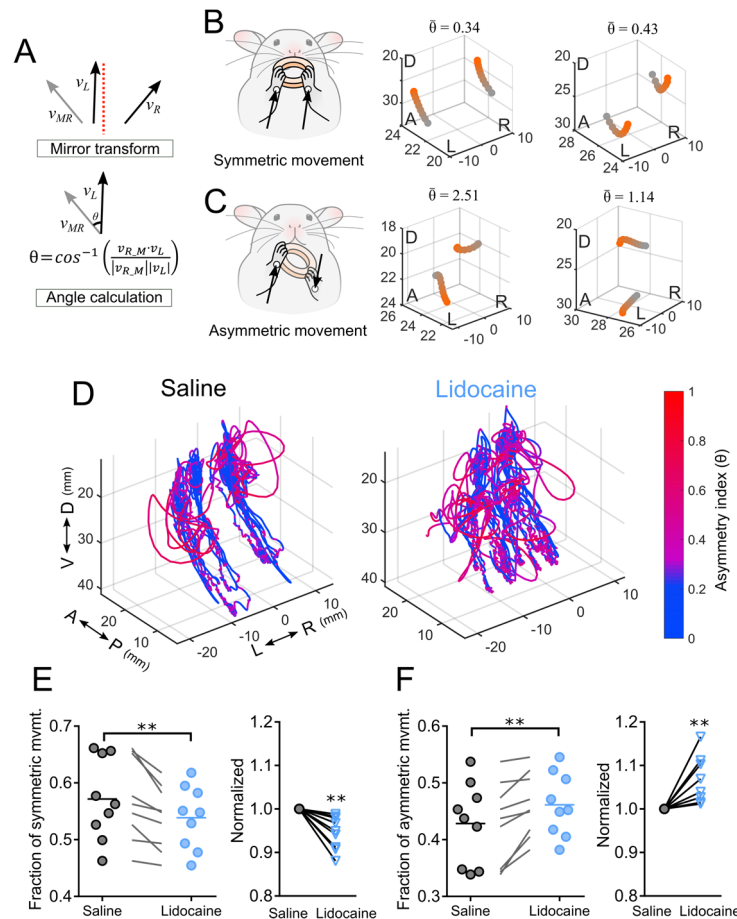

1  
2 **Figure 5. Blockade of anterior corpus callosum made the symmetric forelimb movements**  
3 **more asymmetric in movement direction.**

4 (A) Asymmetry index was computed by the difference of movement direction between the  
5 left forelimb velocity  $v_L$  and the mirrored right forelimb velocity  $v_{MR}$ . The mirror  
6 transformation was applied to the velocity vector  $v_R$  to create the mirrored right forelimb  
7 velocity vector  $v_{MR}$ . The asymmetry index was then computed by the angle between  $v_L$  and  
8  $v_{MR}$ . Asymmetry index represents the degree of divergence in movement direction. (B)  
9 Schematic drawing of symmetric forelimb movements (left panel). The movement directions  
10 are not significantly different across forelimbs in symmetric movements. Representative  
11 fraction of forelimb trajectories in symmetric mode showing  $\bar{\theta} \leq \pi/4$  (middle and right  
12 panel). (C) Schematic drawing of asymmetric forelimb movements (left panel), where the  
13 movement direction diverges. Two representative forelimb trajectories in asymmetric mode  
14 are shown  $\bar{\theta} > \pi/4$  (middle and right panel). (D) Colored forelimb trajectories of saline



15 (left) and Lidocaine injected group (right). The asymmetry index was indicated using a color  
16 scale. (E-F) Reduction of the ratio of symmetric movements and the increase of asymmetric  
17 movements. (E) Quantitative analysis of the fraction of time spent on symmetric movements  
18  $\bar{\theta} \leq \pi/4$  during food consumption (left), and the normalized change (right) (paired t-test, p  
19 = 0.0043, n = 9). (F) Quantitative analysis of the fraction of time spent on asymmetric  
20 movements  $\bar{\theta} > \pi/4$  during food consumption (left), and the normalized change (right)  
21 (paired t-test, p = 0.0043, n = 9). Note the fraction of time of asymmetric movements  
22 complements symmetric movements. D, dorsal; V, ventral; A, anterior; P, posterior; R, right;  
23 L, left. Numbers in 3-D plots are expressed in millimeters.

**Table 1 Coordinates of injection sites**

| Subject ID | Anterior from Bregma | Left from Bregma | Ventral from pia matter |
|------------|----------------------|------------------|-------------------------|
| Subj_38    | +0.8mm               | +0.9mm           | +3.0mm                  |
| Subj_39    | +0.9mm               | +0.4mm           | +3.5mm                  |
| Subj_40    | +1.1mm               | -0.9mm           | +3.5mm                  |
| Subj_41    | +1.8mm*              | +0.5mm           | +3.0mm                  |
| Subj_42    | +1.6mm               | +0.6mm           | +3.0mm                  |
| Subj_43    | +1.8mm*              | +0.7mm           | +3.0mm                  |
| Subj_47    | +0.7mm               | -0.9mm           | +2.8mm                  |
| Subj_49    | +0.5mm               | -0.8mm           | +3.2mm                  |
| Subj_50    | +0.7mm               | -0.8mm           | +3.2mm                  |
| Subj_51    | +1.4mm               | +0.5mm           | +3.0mm                  |
| Subj_52    | -0.4mm*              | +0.8mm           | +3.0mm                  |
| Subj_53    | +0.6mm               | -1.0mm           | +3.2mm                  |

24 \*missed target

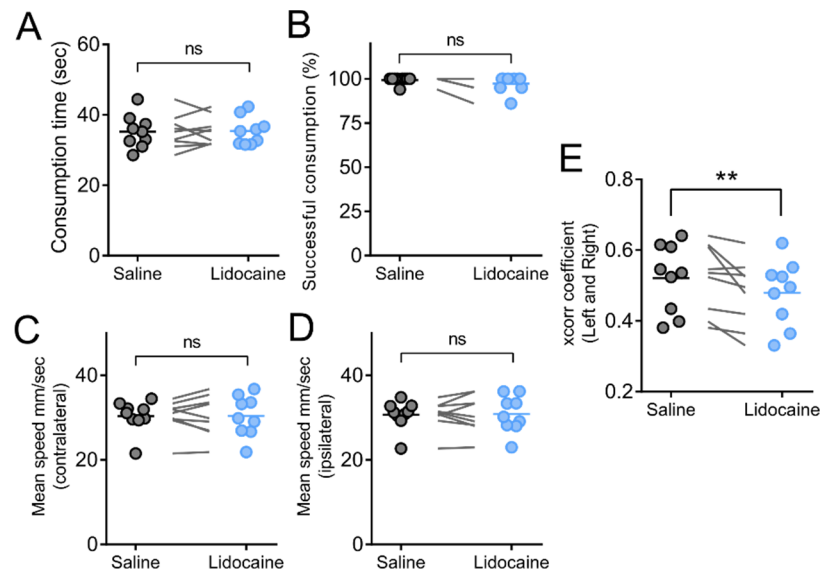

1

2 **Supplemental figure 1. Inhibition of aCC did not alter global motor/task performances**  
3 **but cross correlation.**

4 (A) Mean consumption time (ns,  $p=0.8635$ ). (B) Successful rate was unchanged (ns,  $p=0.0909$ ).  
5 (C) The mean speed of forelimb contralateral to the Lidocaine infusion (ns,  $p=0.9825$ ), and the  
6 ipsilateral (D, ns,  $p=0.8361$ ). (E) cross-correlation between velocity of left and mirrored-right  
7 forelimb (significant,  $p=0.0255$ ). All statistical significance was validated by paired t-test ( $n=9$ ).

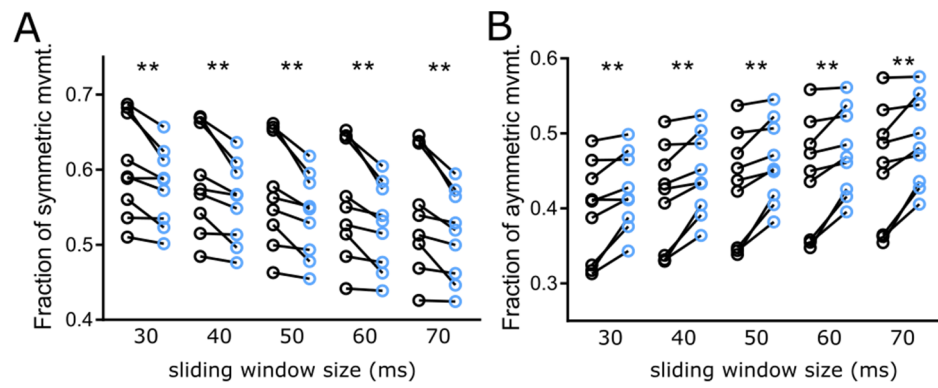

8

9 **Supplemental figure 2. Reduction of symmetric movements with different sliding window**  
10 **sizes.**

11 To test the effect of size of sliding window in the kinematic analysis, five different time  
12 windows were used to reanalyze symmetric and asymmetric ratio. The reduction of symmetric  
13 fraction and increase of asymmetric fraction was consistently observed all different time  
14 window.

15

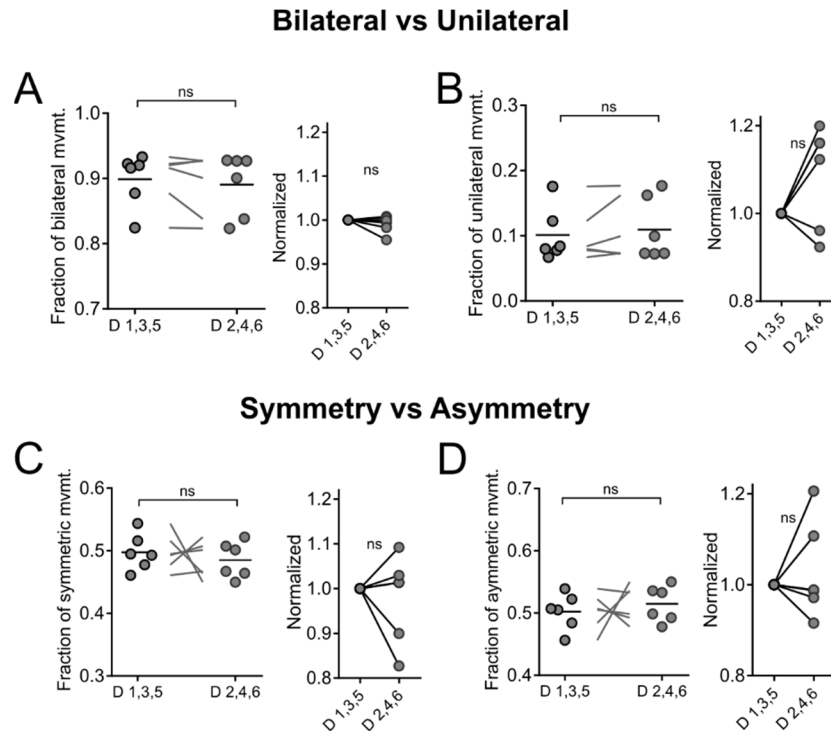

16

17 **Supplemental figure 3. No significant difference in Naïve control group.**

18 (A) Quantitative analysis of the fraction of time on bilateral movements  $SR \geq 0.5$  during food  
 19 consumption (left), and the normalized value (right) (paired t-test,  $p = 0.293$ ,  $n = 6$ ). The  
 20 horizontal bar in the left panel is mean. (B) Quantitative analysis of the fraction of time on  
 21 unilateral movements  $SR < 0.5$  during food consumption (left), and the normalized value  
 22 (right) (paired t-test,  $p = 0.293$ ,  $n = 6$ ). (C) Quantitative analysis of the fraction of time on  
 23 symmetric movements  $\bar{\theta} \leq \pi/4$  (left), and the normalized value (right) (paired t-test,  $p =$   
 24  $0.574$ ,  $n = 6$ ). (D) Quantitative analysis of the fraction of time on asymmetric movements  $\bar{\theta} >$   
 25  $\pi/4$  (left), and the normalized value (right) (paired t-test,  $p = 0.574$ ,  $n = 6$ ). Note the fraction  
 26 of time of asymmetry and unilateral movements are counterpart of symmetric movements and  
 27 bilateral movements respectively.

28
